# Supplementary material for: Discovery and evaluation of a single source selenium sulfide precursor for the synthesis of alloy PbSxSe1−x nanocrystals
Source: Royal Society of Chemistry journal article supplement (doi:10.1039/c2jm30408b), 2012-01-01
Supplement: c2jm30408b.pdf [file c2jm30408b.pdf]

Supporting Information for:

Discovery and Evaluation of a Single Source  
Selenium Sulfide Precursor for the Synthesis of  
Alloy  $\text{PbS}_x\text{Se}_{1-x}$  Nanocrystals

*Jordan W. Thomson, Xiang Wang, Laura Hoch, Daniel Faulkner, Srebri Petrov, and*

*Geoffrey A. Ozin\**

Dept. of Chemistry, University of Toronto, 80 St. George St., Toronto

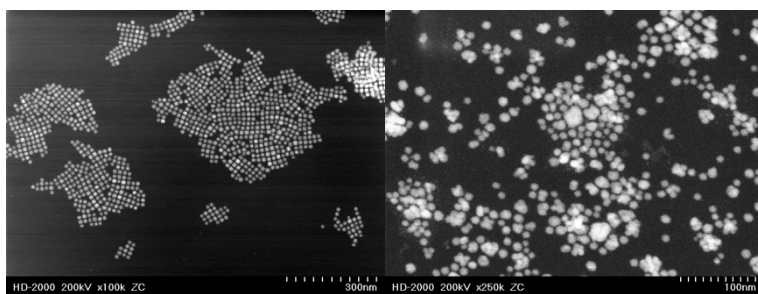

**Figure S1.** STEM images of  $\text{PbS}_x\text{Se}_{1-x}$  nanocrystals grown at 130 °C with (L) 4:1 and (R) 1:1 (S+Se):Pb ratios.

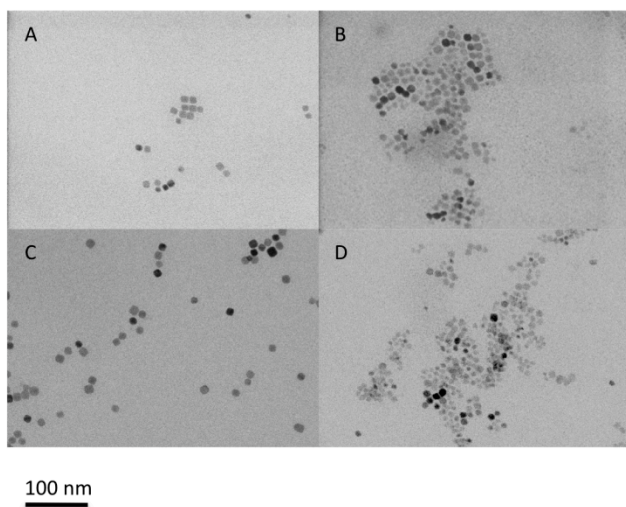

**Figure S2.** Selected TEM images of  $\text{PbS}_x\text{Se}_{1-x}$  nanocrystals prepared from (A) S, (B)  $\text{SeS}_4$ , (C)  $\text{SeS}_2$ , and (D)  $\text{Se}_2\text{S}$ .

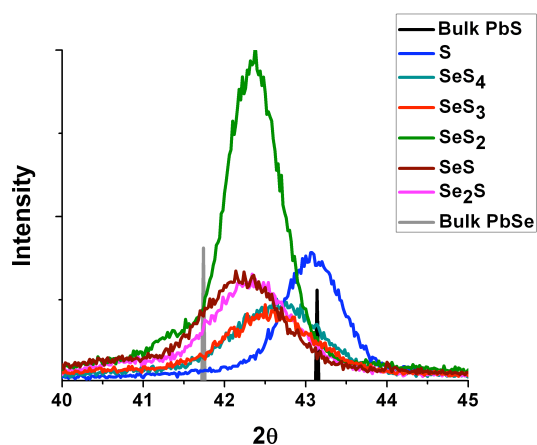

**Figure S3.** (220) diffraction peak for a series of  $\text{PbS}_x\text{Se}_{1-x}$  nanocrystals.

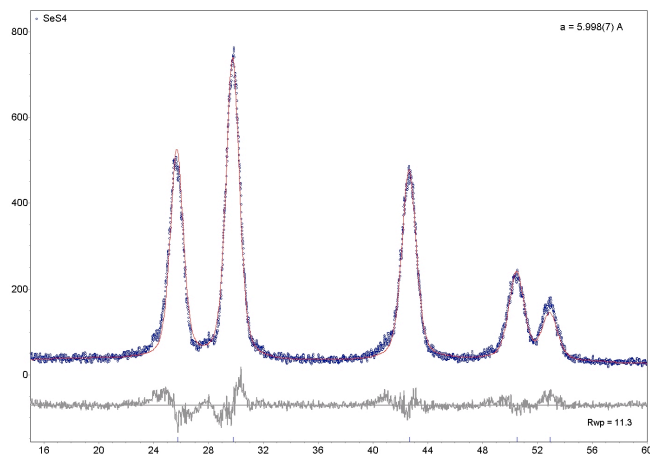

**Figure S4.** Rietveld refinement for  $\text{PbS}_x\text{Se}_{1-x}$  sample prepared from  $\text{SeS}_4$ .

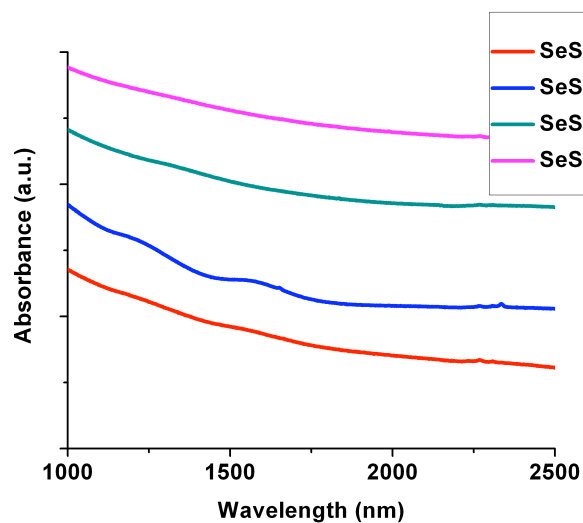

**Figure S5.** UV-Vis absorption edge for selected  $\text{PbS}_x\text{Se}_{1-x}$  nanocrystals in tetrachloroethylene.
